# Supplementary figures and images for: Composition of Microbial Oral Biofilms during Maturation in Young Healthy Adults
Source: PLOS journal article supplement (doi:10.1371/journal.pone.0087449), 2014-02-04

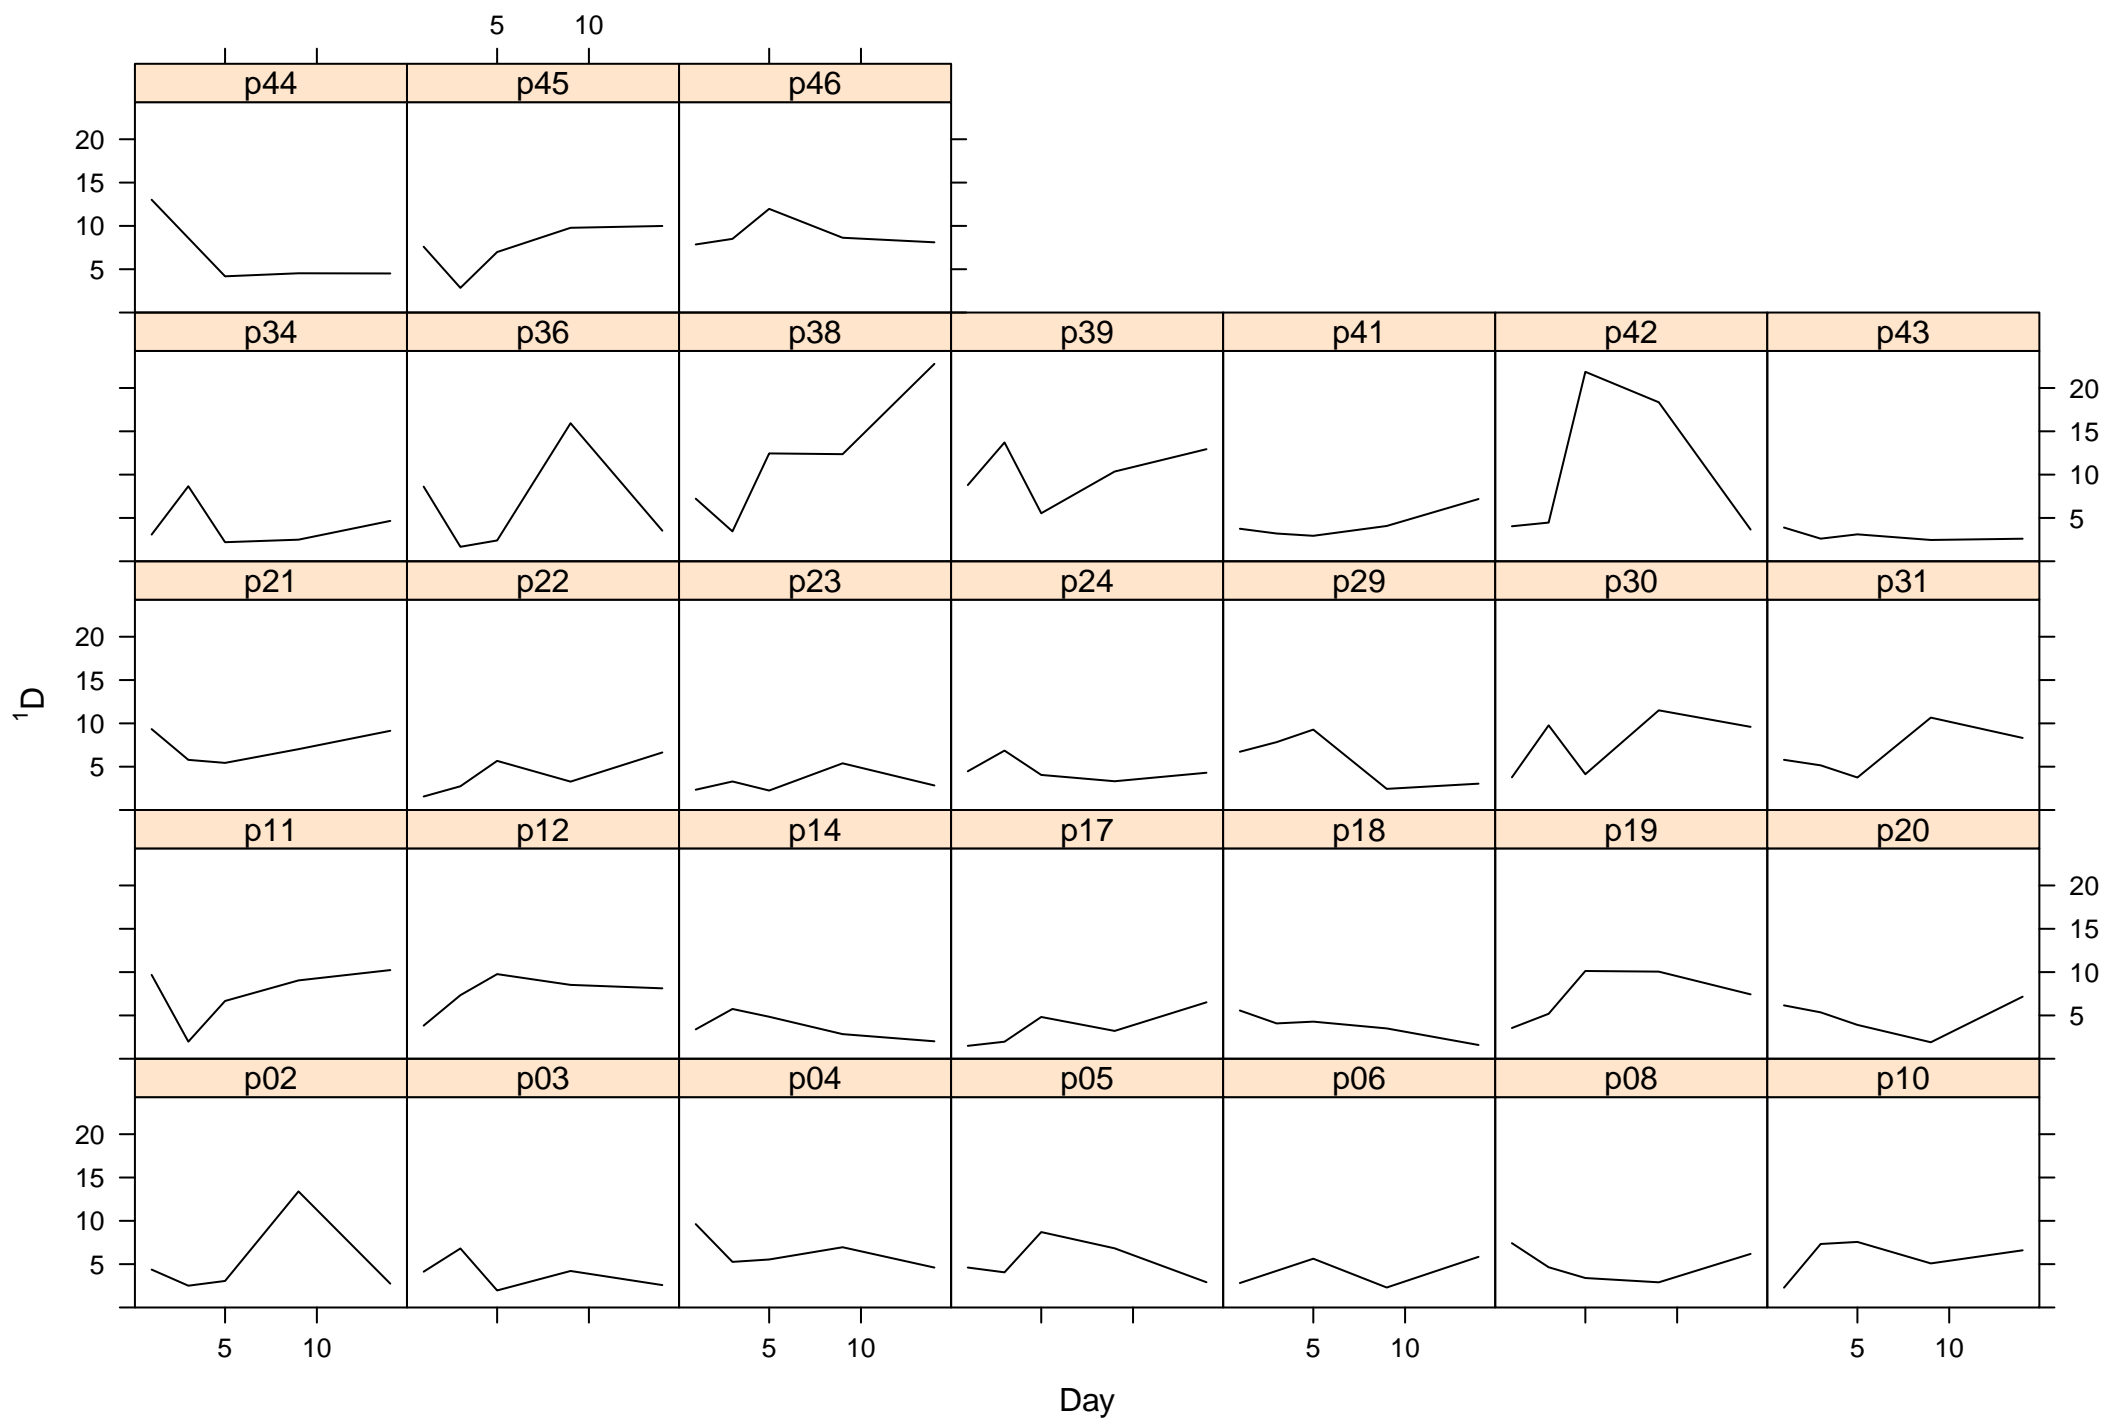

Supplement: S1 (10.1371/journal.pone.0087449.s001) [file journal.pone.0087449.s001]
